# Supplementary material for: Flavonoid Compounds and Photosynthesis in Passiflora Plant Leaves under Varying Light Intensities
Source: MDPI journal article supplement (doi:10.3390/plants9050633), 2020-05-15
Supplement: s1 [file s1]

**Table S1.** Effects of light intensity on the leaf number, length, width, and dry weight of Tainung No. 1 and *Passiflora suberosa* plants.

| Variety             | Light intensity treatment | Leaf number     | Leaf length (cm)   | Leaf width (cm)    | Leaf area (cm <sup>2</sup> ) | Dry weight (g/leaf) |
|---------------------|---------------------------|-----------------|--------------------|--------------------|------------------------------|---------------------|
| Tainung No. 1       | LI-100                    | 10.67 ± 1.51 bB | 7.94 ± 1.06<br>bA  | 7.58 ± 1.55<br>bA  | 32.28 ± 9.44<br>bA           | 0.11 ± 0.04<br>bA   |
|                     | LI-50                     | 16.33 ± 1.51 aB | 9.58 ± 1.75<br>bA  | 9.68 ± 2.13<br>abA | 49.88 ± 16.68<br>bA          | 0.17 ± 0.08<br>aA   |
|                     | LI-15                     | 16.50 ± 1.05 aB | 12.61 ± 1.25<br>aA | 10.63 ± 1.79<br>aA | 71.63 ± 16.24<br>aA          | 0.17 ± 0.06<br>aA   |
| <i>P. suberosa</i>  | LI-100                    | 23.17 ± 1.94 aA | 5.95 ± 0.37 bB     | 7.57 ± 0.52<br>bA  | 21.21 ± 2.56 bB              | 0.08 ± 0.01<br>aA   |
|                     | LI-50                     | 21.50 ± 1.38 aA | 6.67 ± 0.36 aB     | 8.07 ± 0.31<br>abA | 25.35 ± 2.26 aB              | 0.07 ± 0.01<br>abB  |
|                     | LI-15                     | 18.50 ± 0.84 bA | 6.95 ± 0.22 aB     | 8.42 ± 0.45<br>aB  | 27.50 ± 1.86 aB              | 0.06 ± 0.02<br>bB   |
| Source of variation |                           |                 |                    |                    |                              |                     |
| Variety (V)         |                           | ***             | ***                | **                 | ***                          | NS                  |
| Light intensity (L) |                           | **              | ***                | **                 | ***                          | ***                 |
| L × V               |                           | ***             | ***                | NS                 | **                           | NS                  |

Data were recorded and calculated after 2 months of light-intensity treatment of six replicates. Means in the same column within a light treatment followed by different lowercase letters significantly differ at  $p \leq 0.05$  by the least significant difference (LSD) test. Means in the same column within the same light treatment of the two species followed by different capital letters significantly differ at  $p \leq 0.05$  by the LSD test. Each treatment was assumed to be dependent on the other. ANOVA results of the main effects of variety (V), light intensity (L), and their interaction effect (L × V) on the leaf growth of *Passiflora* species are shown as NS, nonsignificant; \*\*  $p \leq 0.01$  and \*\*\*  $p \leq 0.001$ . LI-100 (100% light intensity, non-shaded, as the control), LI-50 (50% light intensity, 50% shaded), and LI-15 (15% light intensity, 85% shaded) represent for the average light intensity passing through in each treatment at 1396, 619, and 187  $\mu\text{mol m}^{-2}\text{s}^{-1}$  PPFD, respectively.

**Table S2.** Effects of light intensity on minimal fluorescence (Fo), maximal fluorescence (Fm), maximum photochemical efficiency of photosystem II (Fv/Fm), and soil-plant analysis development (SPAD) values of Tainung No. 1 and *Passiflora suberosa* plants.

| Variety             | Light intensity treatment | Fo                | Fm                  | Fv/Fm          | SPAD value      |
|---------------------|---------------------------|-------------------|---------------------|----------------|-----------------|
| Tainung No. 1       | LI-100                    | 345.83 ± 18.98 bB | 1674.17 ± 185.13 bB | 0.78 ± 0.01 aA | 29.00 ± 3.03 aB |
|                     | LI-50                     | 364.07 ± 21.09 bA | 1687.67 ± 93.11 bB  | 0.79 ± 0.01 aA | 32.35 ± 1.47 aB |
|                     | LI-15                     | 396.67 ± 32.13 aA | 1989.33 ± 216.22 aA | 0.80 ± 0.03 aA | 34.27 ± 1.96 aA |
| <i>P. suberosa</i>  | LI-100                    | 381.67 ± 18.40 aA | 1863.83 ± 133.91 aA | 0.79 ± 0.02 aA | 36.66 ± 2.92 aA |
|                     | LI-50                     | 383.17 ± 15.38 aA | 1942.33 ± 117.48 aA | 0.80 ± 0.01 aA | 37.10 ± 1.66 aA |
|                     | LI-15                     | 388.17 ± 24.60 aA | 1985.50 ± 256.34 aA | 0.81 ± 0.02 aA | 37.26 ± 1.12 aA |
| Source of variation |                           |                   |                     |                |                 |
| Variety (V)         |                           | NS                | *                   | NS             | *               |
| Light intensity (L) |                           | *                 | *                   | NS             | ***             |
| L × V               |                           | *                 | NS                  | NS             | *               |

Data were recorded and calculated after 2 months of light-intensity treatment of six replicates. Means in the same column within a light treatment followed by different lowercase letters significantly differ at  $p \leq 0.05$  by the least significant difference (LSD) test. Means in the same column within the same light treatment of the two species followed by different capital letters significantly differ at  $p \leq 0.05$  by the LSD test. Each treatment was assumed to be dependent on the other. ANOVA results of the main effects of variety (V), light intensity (L), and their interaction effect (L × V) on the leaf growth of *Passiflora* species are shown as NS, nonsignificant; \*  $p \leq 0.05$  and \*\*\*  $p \leq 0.001$ . LI-100 (100% light intensity, non-shaded, as the control), LI-50 (50% light intensity, 50% shaded), and LI-15 (15% light intensity, 85% shaded) represent for the average light intensity passing through in each treatment at 1396, 619, and 187  $\mu\text{mol m}^{-2}\text{s}^{-1}$  PPFD, respectively.

**Table S3.** Effects of light intensity on the net photosynthetic rate (Pn), transpiration rate (E), stomatal conductance to water vapor (Gs), and intercellular to atmospheric CO<sub>2</sub> concentration ratio (Ci/Ca) of Tainung No. 1 and *Passiflora suberosa* plants.

| Variety             | Light intensity treatment | Pn ( $\mu\text{mol}\cdot\text{CO}_2\cdot\text{m}^{-2}\cdot\text{s}^{-1}$ ) | E ( $\text{mmol}\cdot\text{H}_2\text{O}\cdot\text{m}^{-2}\cdot\text{s}^{-1}$ ) | Gs ( $\text{mol}\cdot\text{m}^{-2}\cdot\text{s}^{-1}$ ) | Ci/Ca           |
|---------------------|---------------------------|----------------------------------------------------------------------------|--------------------------------------------------------------------------------|---------------------------------------------------------|-----------------|
| Tainung No. 1       | LI-100                    | 1.28 ± 1.51 aA                                                             | 0.43 ± 0.05 aA                                                                 | 0.02 ± 0.02 aA                                          | 0.65 ± 0.19 bA  |
|                     | LI-50                     | 1.84 ± 1.13 aA                                                             | 0.50 ± 0.03 aA                                                                 | 0.02 ± 0.01 aA                                          | 0.71 ± 0.12 abA |
|                     | LI-15                     | 0.68 ± 0.45 aB                                                             | 0.27 ± 0.07 bB                                                                 | 0.01 ± 0.01 aB                                          | 0.77 ± 0.10 aA  |
| <i>P. suberosa</i>  | LI-100                    | 1.16 ± 0.41 aA                                                             | 0.52 ± 0.06 bA                                                                 | 0.02 ± 0.01 aA                                          | 0.63 ± 0.23 aA  |
|                     | LI-50                     | 1.52 ± 0.65 aA                                                             | 0.60 ± 0.11 abA                                                                | 0.02 ± 0.01 aA                                          | 0.64 ± 0.07 aA  |
|                     | LI-15                     | 2.14 ± 0.67 aA                                                             | 0.76 ± 0.16 aA                                                                 | 0.03 ± 0.01 aA                                          | 0.62 ± 0.05 aB  |
| Source of variation |                           |                                                                            |                                                                                |                                                         |                 |
| Variety (V)         |                           | NS                                                                         | NS                                                                             | NS                                                      | NS              |
| Light intensity (L) |                           | *                                                                          | **                                                                             | *                                                       | *               |
| L × V               |                           | NS                                                                         | NS                                                                             | NS                                                      | NS              |

Data were recorded and calculated after 2 months of light-intensity treatment of six replicates. Means in the same column within a light treatment followed by different lowercase letters significantly differ at  $p \leq 0.05$  by the least significant difference (LSD) test. Means in the same column within the same light treatment of the two species followed by different capital letters significantly differ at  $p \leq 0.05$  by the LSD test. Each treatment was assumed to be dependent on the other. ANOVA results of the main effects of variety (V), light intensity (L), and their interaction effect (L × V) on the leaf growth of *Passiflora* species are shown as NS, nonsignificant; \*  $p \leq 0.05$  and \*\*  $p \leq 0.01$ . LI-100 (100% light intensity, non-shaded, as the control), LI-50 (50% light intensity, 50% shaded), and LI-15 (15% light intensity, 85% shaded) represent for the average light intensity passing through in each treatment at 1396, 619, and 187  $\mu\text{mol m}^{-2}\text{s}^{-1}$  PPFD, respectively.

**Table S4.** Effects of the light intensity on contents of total phenol, total flavonoid, orientin, and isovitexin per leaf and per plant in Tainung No. 1. and *Passiflora suberosa* plants.

| Variety             | Light intensity treatment | Total phenol concentration ( $\mu\text{g GAE (g DW)}^{-1}$ ) | Total phenol content ( $\mu\text{g GAE per plant}$ ) | Total flavonoid concentration ( $\mu\text{g RE (g DW)}^{-1}$ ) | Total flavonoids content ( $\mu\text{g RE per plant}$ ) | Orientin concentration ( $\mu\text{g (g DW)}^{-1}$ ) | Orientin content ( $\mu\text{g per plant}$ ) | Isovitexin Concentration ( $\mu\text{g (g DW)}^{-1}$ ) | Isovitexin content ( $\mu\text{g per plant}$ ) |
|---------------------|---------------------------|--------------------------------------------------------------|------------------------------------------------------|----------------------------------------------------------------|---------------------------------------------------------|------------------------------------------------------|----------------------------------------------|--------------------------------------------------------|------------------------------------------------|
| Tainung No. 1       | LI-100                    | 1001.89 $\pm$ 28.41 aB                                       | 187.90 $\pm$ 30.49 cB                                | 3719.78 $\pm$ 170.74 aB                                        | 664.98 $\pm$ 70.99 bA                                   | 199.48 $\pm$ 50.08 aA                                | 25.53 $\pm$ 5.20 aA                          | 62.05 $\pm$ 3.85 aB                                    | 11.58 $\pm$ 2.11 bB                            |
|                     | LI-50                     | 1048.48 $\pm$ 25.85 aA                                       | 364.85 $\pm$ 20.52 aB                                | 2666.89 $\pm$ 402.16 bB                                        | 934.07 $\pm$ 56.60 aA                                   | 89.39 $\pm$ 11.98 bB                                 | 23.90 $\pm$ 2.04 aA                          | 53.79 $\pm$ 5.14 bB                                    | 15.80 $\pm$ 3.16 aA                            |
|                     | LI-15                     | 1014.90 $\pm$ 64.56 aB                                       | 294.76 $\pm$ 39.62 bB                                | 1072.97 $\pm$ 136.06 cB                                        | 277.68 $\pm$ 42.02 cA                                   | 25.71 $\pm$ 3.34 cB                                  | 5.69 $\pm$ 0.72 bB                           | 37.28 $\pm$ 0.62 cA                                    | 10.14 $\pm$ 1.09 bA                            |
| <i>P. suberosa</i>  | LI-100                    | 1073.27 $\pm$ 37.47 bA                                       | 2786.73 $\pm$ 224.65 bA                              | 4611.73 $\pm$ 480.63 aA                                        | 673.06 $\pm$ 20.16 aA                                   | 187.50 $\pm$ 17.62 aA                                | 31.73 $\pm$ 2.73 aA                          | 687.18 $\pm$ 144.28 aA                                 | 103.92 $\pm$ 19.11 aA                          |
|                     | LI-50                     | 1121.33 $\pm$ 76.33 abA                                      | 2717.29 $\pm$ 186.18 bA                              | 3762.73 $\pm$ 305.40 bA                                        | 500.33 $\pm$ 41.60 bB                                   | 151.46 $\pm$ 14.86 bA                                | 22.61 $\pm$ 0.94 bA                          | 139.80 $\pm$ 23.65 bA                                  | 19.52 $\pm$ 2.76 bA                            |
|                     | LI-15                     | 1196.62 $\pm$ 99.13 aA                                       | 3921.66 $\pm$ 808.59 aA                              | 2733.10 $\pm$ 149.55 cA                                        | 291.68 $\pm$ 51.24 cA                                   | 184.81 $\pm$ 6.46 aA                                 | 22.29 $\pm$ 4.77 bA                          | 34.05 $\pm$ 3.87 cA                                    | 3.26 $\pm$ 0.23 cB                             |
| Source of variation |                           |                                                              |                                                      |                                                                |                                                         |                                                      |                                              |                                                        |                                                |
| Variety (V)         |                           | NS                                                           | ***                                                  | ***                                                            | ***                                                     | ***                                                  | ***                                          | ***                                                    | ***                                            |
| Light intensity (L) |                           | ***                                                          | **                                                   | ***                                                            | ***                                                     | ***                                                  | ***                                          | ***                                                    | ***                                            |
| L $\times$ V        |                           | *                                                            | **                                                   | *                                                              | ***                                                     | ***                                                  | ***                                          | ***                                                    | ***                                            |

Data were recorded and calculated after 2 months of light-intensity treatment of six replicates. Means in the same column within a light treatment followed by different lowercase letters significantly differ at  $p \leq 0.05$  by the least significant difference (LSD) test. Means in the same column within the same light treatment of the two species followed by different capital letters significantly differ at  $p \leq 0.05$  by the LSD test. Each treatment was assumed to be dependent on the other. ANOVA results of the main effects of variety (V), light intensity (L), and their interaction effect (L  $\times$  V) on the leaf growth of *Passiflora* species are shown as NS, nonsignificant; \*  $p \leq 0.05$ , \*\*  $p \leq 0.01$ , and \*\*\*  $p \leq 0.001$ . LI-100 (100% light intensity, non-shaded, as the control), LI-50 (50% light intensity, 50% shaded), and LI-15 (15% light intensity, 85% shaded) represent for the average light intensity passing through in each treatment at 1396, 619, and 187  $\mu\text{mol m}^{-2}\text{s}^{-1}$  PPFD, respectively.
